# Supplementary material
Source: ML conference proceedings conference paper supplement (https://openreview.net/forum?id=11WmFbrIt26)
Supplement: supplementary_material [file attachment]

## Appendix

**Lemma 5 (Davis Kahn  $\sin \Theta$  bound [21])** Let  $\Sigma, \hat{\Sigma} \in \mathbb{R}^{D \times D}$  be symmetric, with eigen values  $\lambda_1 \geq \dots \geq \lambda_D$  and  $\hat{\lambda}_1 \geq \dots \geq \hat{\lambda}_D$ , where  $\Sigma v_i = \lambda_i v_i, \forall i \in [D]$  and  $\hat{\Sigma} \hat{v}_i = \hat{\lambda}_i \hat{v}_i, \forall i \in [D]$ . Further, define  $E = [v_1, \dots, v_d] \in \mathbb{R}^{D \times d}$ ,  $\hat{E} = [\hat{v}_1, \dots, \hat{v}_d]$  and assume that  $\delta_* = \lambda_d - \lambda_{d+1} > 0$ .

Then, we have that,

$$\|\sin \Theta(E, \hat{E})\|_F \leq \frac{2\sqrt{d}}{\delta_*} \|\Sigma - \hat{\Sigma}\|_2 \quad (13)$$

**Lemma 6 (Concentration of sub-Gaussian covariance)** Let  $\mathcal{D}$  be a zero-mean sub-Gaussian distribution in  $\mathbb{R}^D$  s.t. for  $X \sim \mathcal{D}$ , we have that,  $\|\langle X, x \rangle\|_{\psi_2} \leq K \|\langle X, x \rangle\|_2, \forall x \in \mathbb{R}^D$ . Denote the covariance matrix  $\Sigma = \mathbb{E}_{X \sim \mathcal{D}} [XX^T]$  and  $\Sigma_n = \frac{1}{n} \sum_{i=1}^n X_i X_i^T$ , where  $X_i \stackrel{i.i.d.}{\sim} \mathcal{D}$ . Then  $\forall \delta > 0$ , we have that,

$$\|\Sigma_n - \Sigma\|_2 \leq CK^2 \|\Sigma\| \left( \sqrt{\frac{D + \log \frac{2}{\delta}}{n}} + \frac{D + \log \frac{2}{\delta}}{n} \right)$$

with probability  $\geq 1 - \delta$ , for some fixed small constant  $C$ .

**Proof:** Refer to Theorem 4.7.1 and Exercise 4.7.3 in Vershynin [17].  $\square$

Note that in large data regime, i.e.  $n \gg D$ , only the first term dominates while in the small data and large dimension regime the second terms dominates. In large data regime, for any given error parameter  $\epsilon > 0$ , one can sample  $n$  large enough and so the first term dominates the second one.

**Lemma 7 (Concentration of Projection matrix)** Let  $X \in \mathbb{R}^D$  be a zero mean sub-gaussian random vector with bounded sub-gaussian norm i.e.

$$\exists K \in \mathbb{R} \text{ s.t. } \|\langle X, v \rangle\|_{\psi_2} \leq K \|\langle X, v \rangle\|_{L^2} \forall v \text{ s.t. } \|v\|_2 = 1$$

Given  $n$  i.i.d sample  $\{X_i\}_{i=1}^n \stackrel{i.i.d.}{\sim} P_X$ , let  $\Sigma_n = \frac{1}{n} \sum_{i=1}^n X_i X_i^T$  be the empirical estimate of the covariance matrix  $\Sigma = \mathbb{E}[XX^T]$ . Further, let the eigen decomposition of  $\Sigma, \Sigma_n$  be given as,

$$\Sigma = \sum_{i=1}^D \lambda_i u_i u_i^T, \quad \Sigma_n = \sum_{i=1}^D \hat{\lambda}_i \hat{u}_i \hat{u}_i^T$$

and  $\text{Proj}_E = \sum_{i=1}^d u_i u_i^T$  and  $\text{Proj}_{E_n} = \sum_{i=1}^d \hat{u}_i \hat{u}_i^T$  denote the projection operator onto the top  $d$  true and empirical eigen subspaces  $E = \text{span}(\{u_i\}_{i=1}^d)$  and  $E_n = \text{span}(\{\hat{u}_i\}_{i=1}^d)$  respectively. Then, if  $n \geq \frac{CdK^4 \|\Sigma\|_2^2}{\delta_*^2 \epsilon^2} (D + \log \frac{2}{\delta})$ , we have,

$$w.p \geq 1 - \delta, \quad \|\text{Proj}_E - \text{Proj}_{E_n}\|_2 \leq \epsilon \quad (14)$$

where  $\delta_*$  is the eigen gap between top  $d$  and the rest eigen subspace of true covariance matrix  $\Sigma$ .

**Proof:** Let  $E^T E_n = U \cos \Theta(E, E_n) V^T$  denote the singular value decomposition of  $E^T E_n$  and  $\cos \Theta(E, E_n) = \text{diag}(\cos \theta_1, \dots, \cos \theta_d)$  be the diagonal matrix with the cosine of principal angles  $\{\theta_1, \dots, \theta_d\}$  between  $E$  and  $E_n$  subspaces as its diagonal entries. With this definition, it is easy to show that,

$$\|\text{Proj}_E - \text{Proj}_{E_n}\|_2 = \sqrt{2} \|\sin \Theta(E, E_n)\|_2$$

Next, using  $\sin \Theta$  variant of Davis Kahn theorem 5, we have,

$$\|\sin \Theta(E, E_n)\|_F \leq \frac{2\sqrt{d}}{\delta_*} \|\Sigma_n - \Sigma\|_2 \quad (15)$$

$$\implies \|\text{Proj}_E - \text{Proj}_{E_n}\|_2 \leq \sqrt{2} \|\sin \Theta(E, E_n)\|_F \leq \frac{2\sqrt{2d}}{\delta_*} \|\Sigma_n - \Sigma\|_2 \quad (16)$$

Note that we have used the fact that  $L_2$  norm is upper bounded by Frobenious norm. Next, using concentration bound for covariance matrix of sub-gaussian random vectors 6(in large sample regime), we have,  $w.p. \geq 1 - \delta$ ,

$$\|\Sigma_n - \Sigma\|_2 \leq CK^2 \|\Sigma\|_2 \sqrt{\frac{D + \log(\frac{2}{\delta})}{n}} \quad (17)$$

Using it along with (16), gives us,  $w.p. \geq 1 - \delta$ ,

$$\|Proj_E - Proj_{E_n}\|_2 \leq \frac{2\sqrt{2d}}{\delta_*} CK^2 \|\Sigma\|_2 \sqrt{\frac{D + \log(\frac{2}{\delta})}{n}} \quad (18)$$

Finally, choosing  $n \geq \frac{CdK^4 \|\Sigma\|^2}{\delta_*^2 \epsilon^2} (D + \log \frac{2}{\delta})$ , establishes the lemma.

□

**Lemma 8 (Performance difference lemma for a general policy)** *Let  $\pi, \pi'$  be two time and history dependent non-Markovian policies acting in environment MDP  $\mathcal{M}$ . Then, the performance difference between the value function of these policy in environment  $\mathcal{M}$  is given by :*

$$V_{\mathcal{M}}^{\pi}(s_0) - V_{\mathcal{M}}^{\pi'}(s_0) = \sum_{t=0}^{\infty} \gamma^t \mathbb{E}_{s_{0:t} \sim d_{\mathcal{M}}^{\pi, 0:t}} \left[ Q_{\mathcal{M}}^{\pi'}(s_{0:t}, \pi(s_{0:t})) - Q_{\mathcal{M}}^{\pi'}(s_{0:t}, \pi'(s_{0:t})) \right] \quad (19)$$

Further, if  $\pi, \pi'$  are Markovian, we have,

$$V_{\mathcal{M}}^{\pi}(s_0) - V_{\mathcal{M}}^{\pi'}(s_0) = \frac{1}{1 - \gamma} \mathbb{E}_{s \sim d_{\mathcal{M}}^{\pi}} \left[ Q_{\mathcal{M}}^{\pi'}(s_t, \pi(s_t)) - V_{\mathcal{M}}^{\pi'}(s_t) \right] \quad (20)$$

**Proof:** We provide a complete proof of the performance difference lemma for self sufficiency.

$$V_{\mathcal{M}}^{\pi}(s_0) - V_{\mathcal{M}}^{\pi'}(s_0) = \mathbb{E} \left[ \sum_{t=0}^{\infty} \gamma^t R(s_t, \pi \circ f(s_t)) \right] - V_{\mathcal{M}}^{\pi' \circ f}(s_0) \quad (21)$$

$$= \mathbb{E} \left[ \sum_{t=0}^{\infty} \gamma^t \left( R(s_t, \pi \circ f(s_{0:t})) + V_{\mathcal{M}}^{\pi' \circ f}(s_{0:t}) - V_{\mathcal{M}}^{\pi' \circ f}(s_{0:t}) \right) \right] - V_{\mathcal{M}}^{\pi' \circ f}(s_0) \quad (22)$$

$$= \mathbb{E} \left[ \sum_{t=0}^{\infty} \gamma^t \left( R(s_t, \pi \circ f(s_{0:t})) + \gamma V_{\mathcal{M}}^{\pi' \circ f}(s_{0:t+1}) - V_{\mathcal{M}}^{\pi' \circ f}(s_{0:t}) \right) \right] \quad (23)$$

$$= \sum_{t=0}^{\infty} \gamma^t \mathbb{E} \left[ \left( R(s_t, \pi \circ f(s_{0:t})) + \gamma V_{\mathcal{M}}^{\pi' \circ f}(s_{0:t+1}) - V_{\mathcal{M}}^{\pi' \circ f}(s_{0:t}) \right) \right] \quad (24)$$

$$= \sum_{t=0}^{\infty} \gamma^t \mathbb{E} \left[ \left( R(s_t, \pi \circ f(s_{0:t})) + \gamma V_{\mathcal{M}}^{\pi' \circ f}(s_{0:t+1}) - V_{\mathcal{M}}^{\pi' \circ f}(s_{0:t}) \right) \right] \quad (25)$$

$$= \sum_{t=0}^{\infty} \gamma^t \mathbb{E}_{s_{0:t} \sim d_{\mathcal{M}}^{\pi \circ f, 0:t}} \left[ \mathbb{E}_{s_{t+1}} \left[ \left( R(s_t, \pi \circ f(s_{0:t})) + \gamma V_{\mathcal{M}}^{\pi' \circ f}(s_{0:t+1}) - V_{\mathcal{M}}^{\pi' \circ f}(s_{0:t}) \right) \mid s_{0:t} \right] \right] \quad (26)$$

$$= \sum_{t=0}^{\infty} \gamma^t \mathbb{E}_{s_{0:t} \sim d_{\mathcal{M}}^{\pi \circ f, 0:t}} \left[ Q_{\mathcal{M}}^{\pi' \circ f}(s_{0:t}, \pi \circ f(s_{0:t})) - V_{\mathcal{M}}^{\pi' \circ f}(s_{0:t}) \right] \quad (27)$$

Further, if  $\pi, \pi'$  are Markovian, it simplifies to

$$V_{\mathcal{M}}^{\pi}(s_0) - V_{\mathcal{M}}^{\pi'}(s_0) = \sum_{t=0}^{\infty} \gamma^t \mathbb{E}_{s \sim d_{\mathcal{M}}^{\pi, t}} \left[ Q_{\mathcal{M}}^{\pi'}(s_t, \pi(s_t)) - V_{\mathcal{M}}^{\pi'}(s_t) \right] \quad (28)$$

$$= \frac{1}{1 - \gamma} \mathbb{E}_{s \sim d_{\mathcal{M}}^{\pi}} \left[ Q_{\mathcal{M}}^{\pi'}(s_t, \pi(s_t)) - V_{\mathcal{M}}^{\pi'}(s_t) \right] \quad (29)$$

□
